# Supplementary material for: A 2-in-1 multi-functional sensor for efficient epinephrine detection based on a cucurbit[7]uril functionalized lanthanide metal–organic framework and its intelligent application in a molecular robot
Source: Royal Society of Chemistry journal article supplement (doi:10.1039/d2tc01550a), 2022-01-01
Supplement: d2tc01550a1.pdf [file d2tc01550a1.pdf]

## Supporting information

### **A 2-in-1 multi-functionalized sensor for efficient epinephrine detection based on cucurbit[7]uril functionalized lanthanide metal-organic framework and its intelligent application on molecular robot**

Yu Zhang<sup>†</sup>, and Bing Yan<sup>\*,†‡</sup>

*<sup>†</sup>Shanghai Key Lab of Chemical Assessment and Sustainability, School of Chemical Science and Engineering, Tongji University, Shanghai 200092, China*

*<sup>‡</sup>School of Materials Science and Engineering, Liaocheng University, Liaocheng 252059, China*

(a)

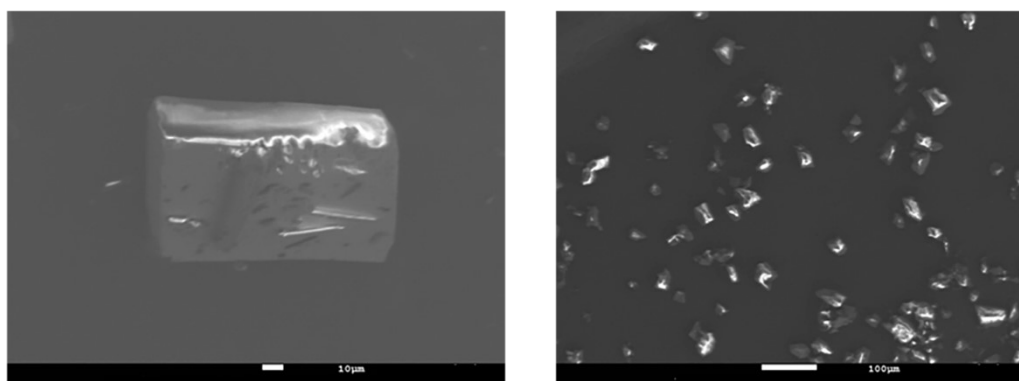

(b)

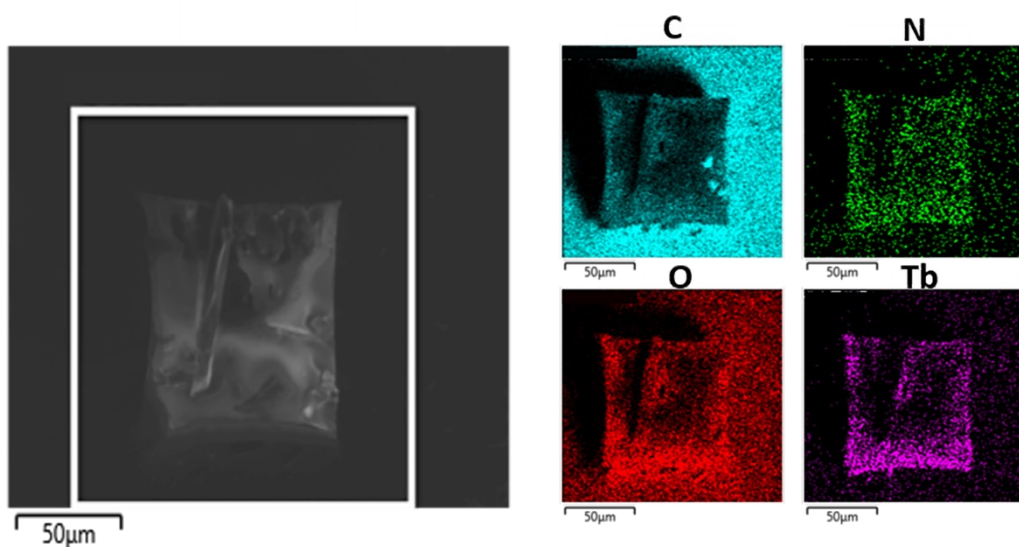

**Figure S1** The (a) SEM image and (b) element mappings of TbMOFs.

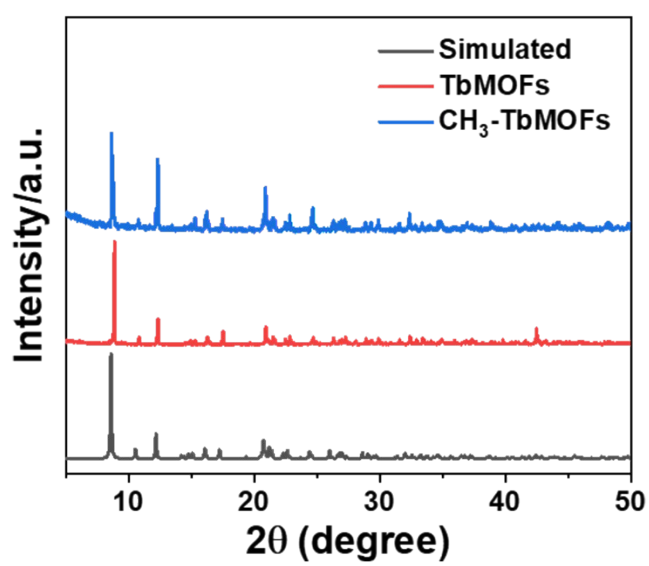

**Figure S2** The PXRD patterns of TbMOFs and CH<sub>3</sub>-TbMOFs.

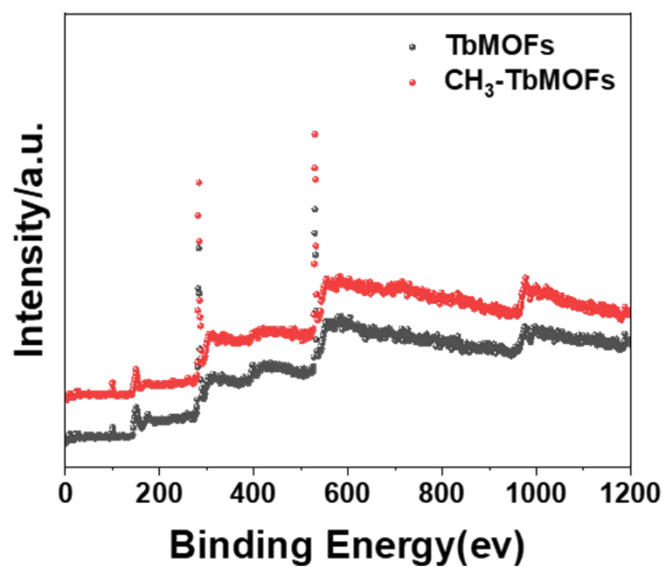

**Figure S3** The XPS spectra of TbMOFs and CH<sub>3</sub>-TbMOFs.

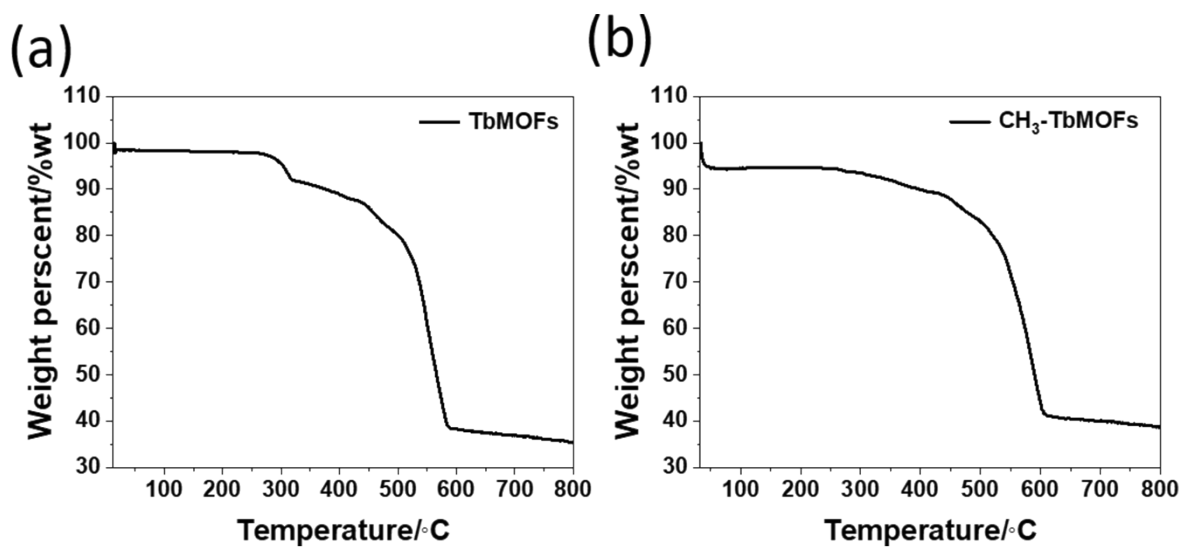

**Figure S4** Thermal gravimetric analysis curves of (a) TbMOFs and (b) CH<sub>3</sub>-TbMOFs.

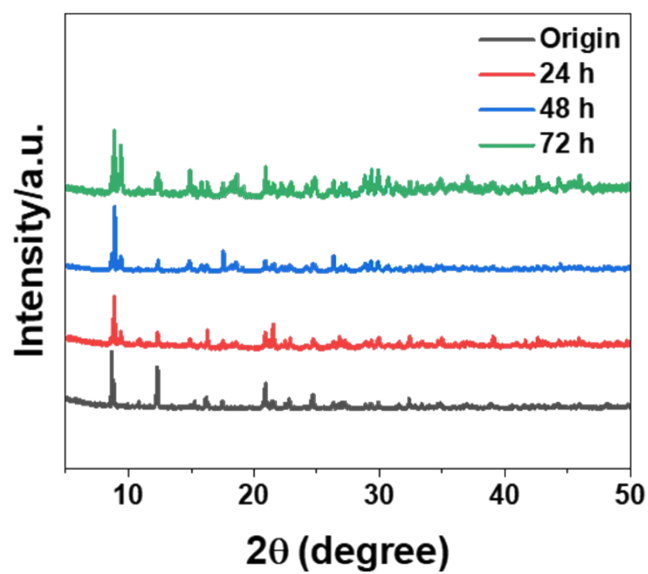

**Figure S5** The PXRD patterns of TbMOFs after being immersed in the H<sub>2</sub>O for 0-72h.

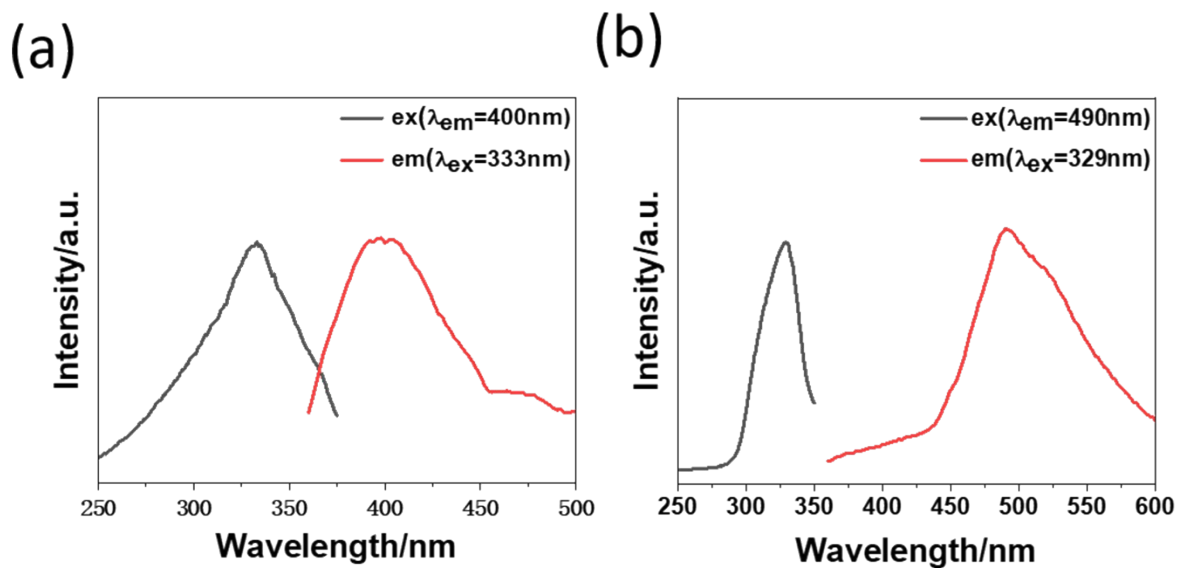

**Figure S6** Excitation (black line) and emission (red line) spectra of (a) H<sub>2</sub>bdc and (b) H<sub>2</sub>bpydc.

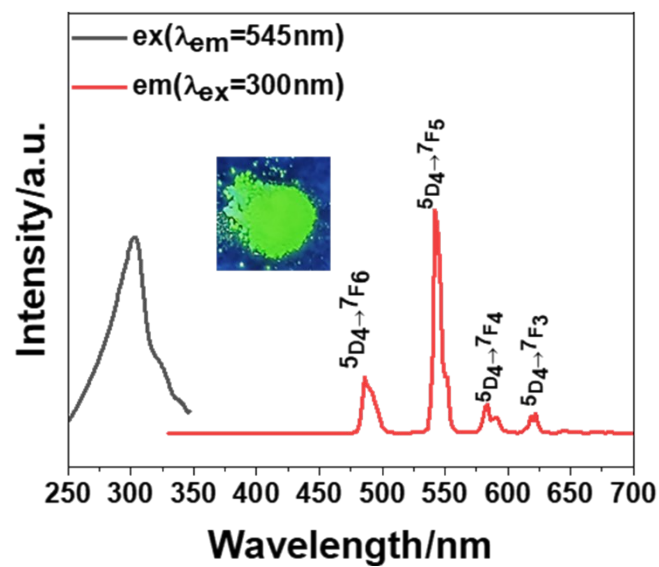

**Figure S7** The excitation (black line) and emission (red line) spectra of TbMOFs in solid state (The inset is corresponding photograph under UV light).

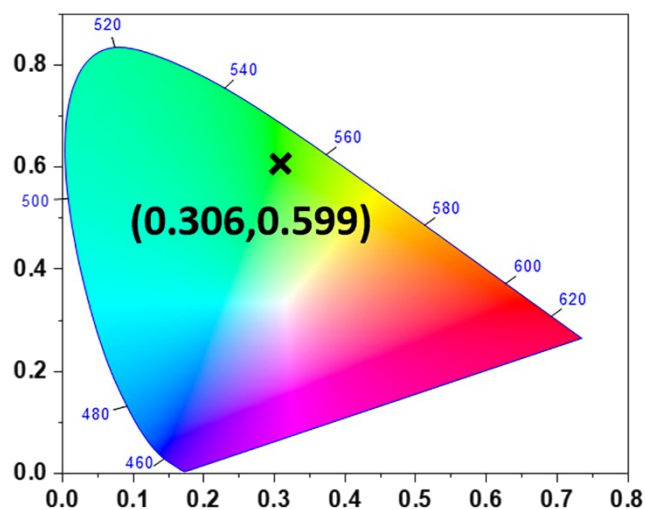

**Figure S8** The corresponding CIE chromaticity diagram of TbMOFs.

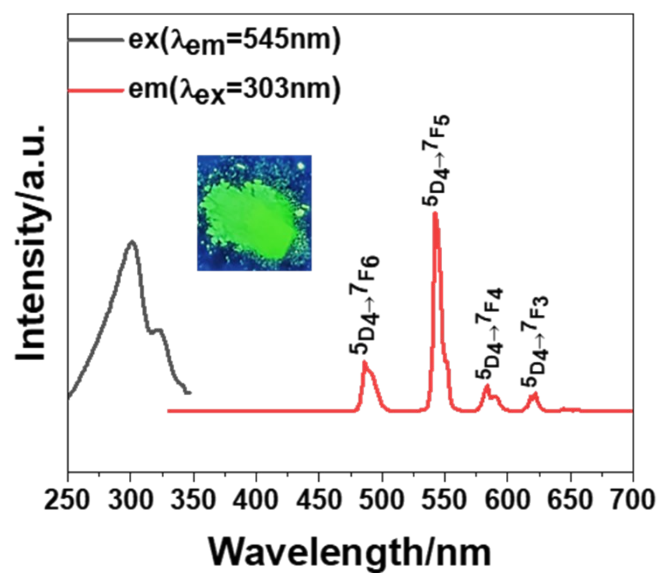

**Figure S9** The excitation (black line) and emission (red line) spectra of CH<sub>3</sub>-TbMOFs in solid state (The inset is corresponding photograph under UV light).

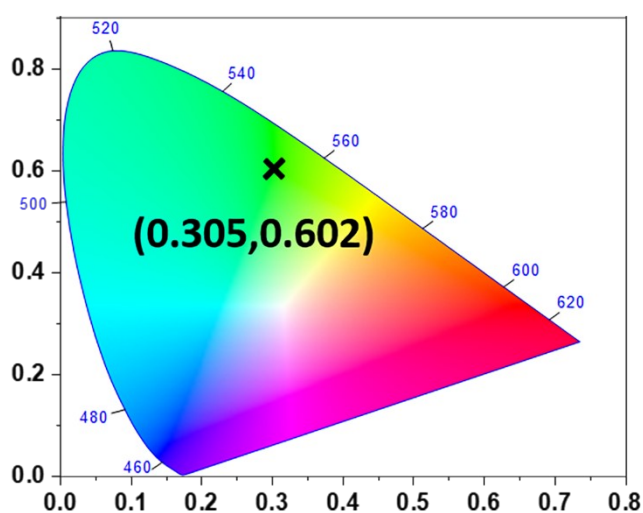

**Figure S10** The corresponding CIE chromaticity diagram of CH<sub>3</sub>-TbMOFs.

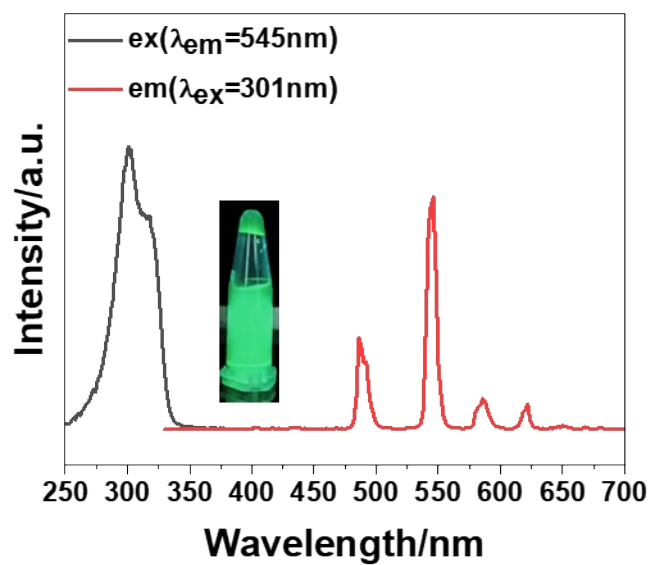

**Figure S11** The excitation (black line) and emission (red line) spectra of  $\text{CH}_3\text{-TbMOFs}$  in aqueous environment.

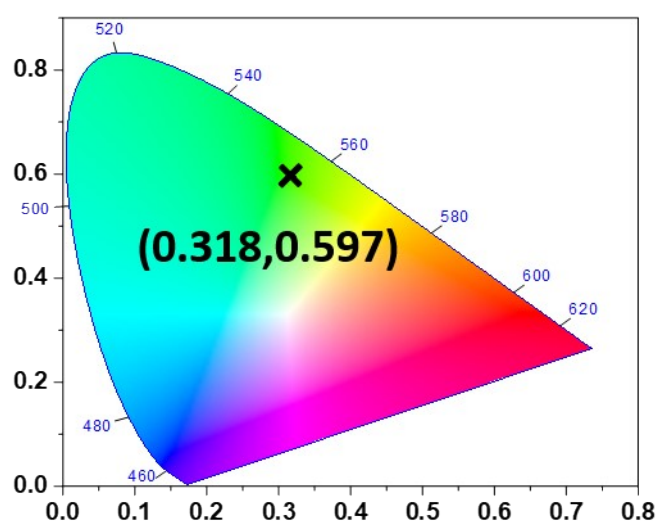

**Figure S12** The corresponding CIE chromaticity diagram of  $\text{CB@CH}_3\text{-TbMOFs}$ .

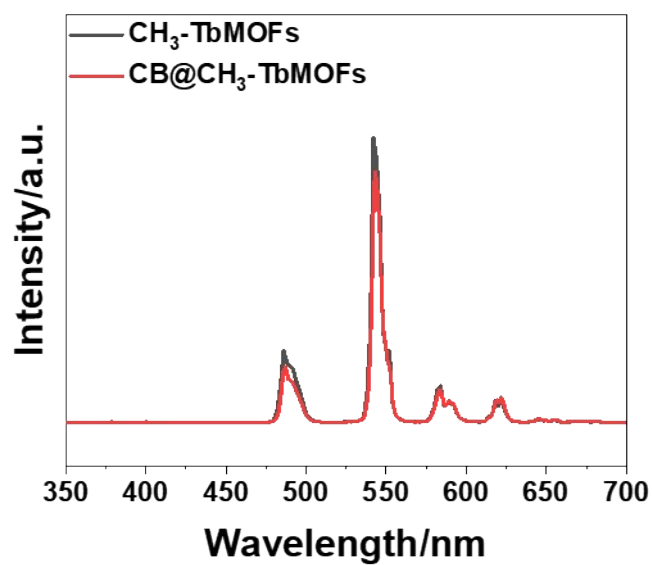

**Figure S13** The emission spectra of CH<sub>3</sub>-TbMOFs and CB@CH<sub>3</sub>-TbMOFs.

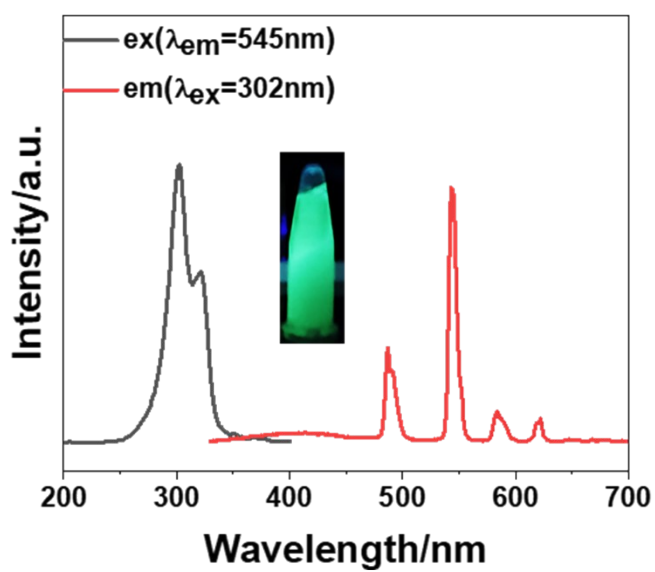

**Figure S14** The excitation (black line) and emission (red line) spectra of CB@CH<sub>3</sub>-TbMOFs in H<sub>2</sub>O (The inset is corresponding photograph under UV light).

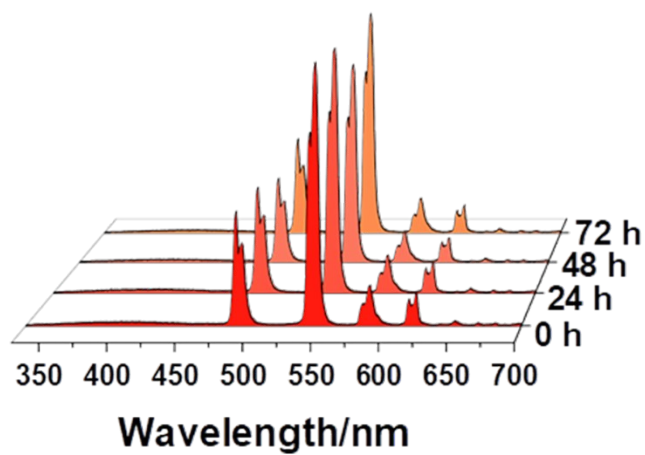

**Figure S15** Day to day fluorescence stability of CB@CH<sub>3</sub>-TbMOFs.

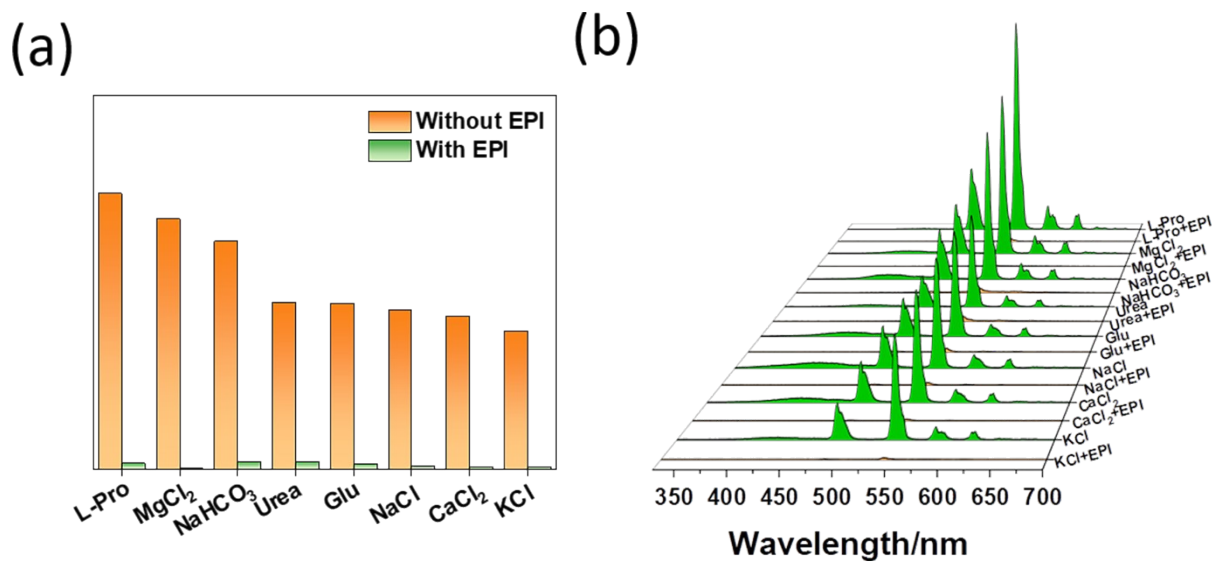

**Figure S16** The (a) histogram and the (b) luminescence responses for the fluorescence of CB@CH<sub>3</sub>-TbMOFs toward other serum components with and without EPI.

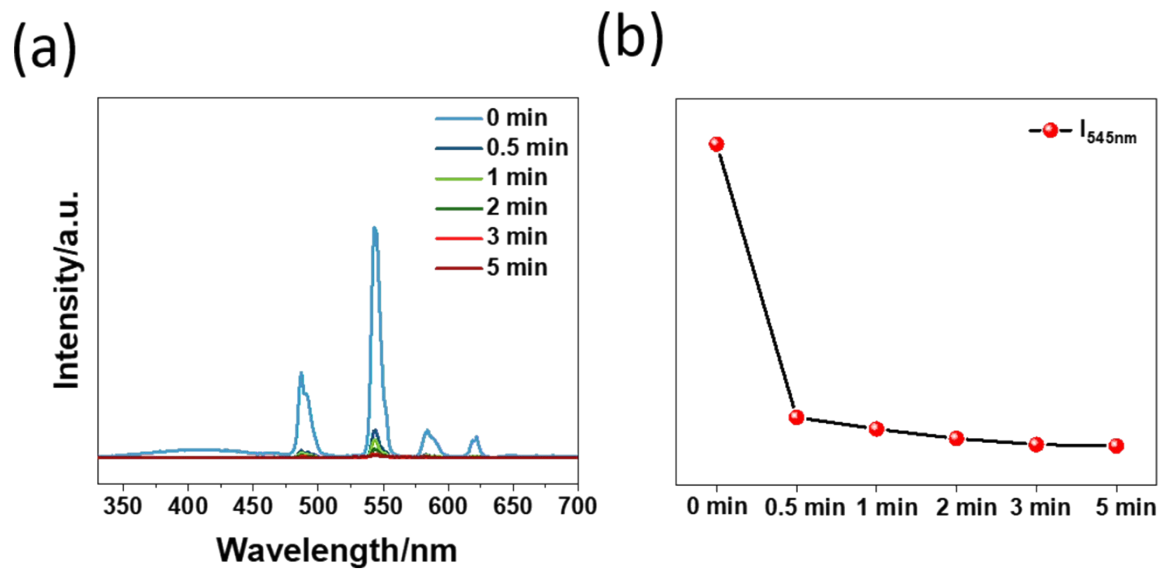

**Figure S17** (a) Variation of luminescent intensity of CB@CH<sub>3</sub>-TbMOFs with different immersion time in EPI; (b) The corresponding line chart.

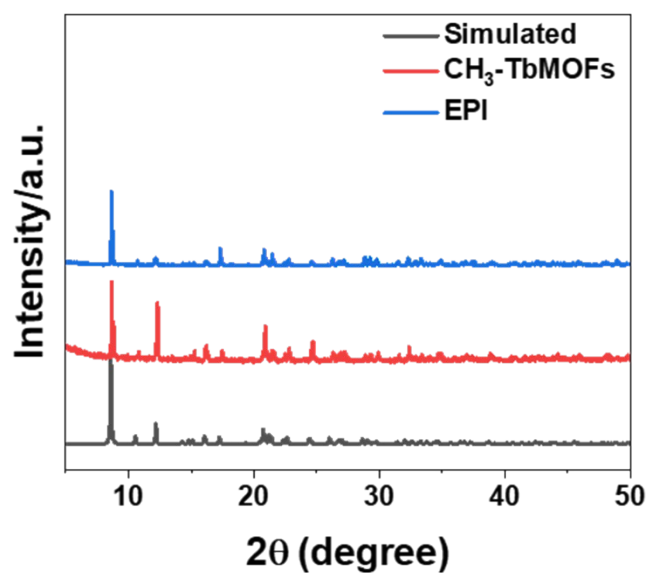

**Figure S18** PXRD patterns of CH<sub>3</sub>-TbMOFs before and after being immersed into EPI.

**Table S1** Lifetimes of CB@CH<sub>3</sub>-TbMOFs immersed in H<sub>2</sub>O, other serum components and EPI.

| Substance | H <sub>2</sub> O | Urea     | NaHCO <sub>3</sub> | L-Pro    | KCl      | MgCl <sub>2</sub> | NaCl     | CaCl <sub>2</sub> | Glu      | EPI      |
|-----------|------------------|----------|--------------------|----------|----------|-------------------|----------|-------------------|----------|----------|
| Lifetimes | 848.84μs         | 962.45μs | 951.23μs           | 949.38μs | 944.31μs | 935.31μs          | 908.22μs | 892.45μs          | 880.89μs | 0.9123μs |

**Table S2** The truth table of Gate 1, Gate 2 and Gate 3.

(a)

Gate 1

| Input 1                     |                 | Output 1 |
|-----------------------------|-----------------|----------|
| C <sub>EPI</sub> <0.08mg/mL | λ <sub>ex</sub> | Light 1  |
| 1                           | 0               | 0        |
| 1                           | 1               | 0        |
| 0                           | 0               | 0        |
| 0                           | 1               | 1        |

(b)

Gate 2

| Input 2                    |                 |          | Output 2 |
|----------------------------|-----------------|----------|----------|
| C <sub>EPI</sub> <0.2mg/mL | λ <sub>ex</sub> | Output 1 | Light 2  |
| 1                          | 0               | 0        | 0        |
| 1                          | 1               | 0        | 0        |
| 0                          | 0               | 0        | 0        |
| 0                          | 1               | 0        | 0        |
| 1                          | 0               | 1        | 0        |
| 1                          | 1               | 1        | 0        |
| 0                          | 0               | 1        | 0        |
| 0                          | 1               | 1        | 1        |

(c)

Gate 3

| Input 3                    |                 |          | Output 3 |
|----------------------------|-----------------|----------|----------|
| C <sub>EPI</sub> <0.8mg/mL | λ <sub>ex</sub> | Output 2 | Light 3  |
| 1                          | 0               | 0        | 0        |
| 1                          | 1               | 0        | 0        |
| 0                          | 0               | 0        | 0        |
| 0                          | 1               | 0        | 0        |
| 1                          | 0               | 1        | 0        |
| 1                          | 1               | 1        | 0        |
| 0                          | 0               | 1        | 0        |
| 0                          | 1               | 1        | 1        |
